# Supplementary material for: Elucidation of the reaction mechanism on dry reforming of methane in an electric field by in situ DRIFTs
Source: Royal Society of Chemistry journal article supplement (doi:10.1039/d2ra00402j), 2022-01-01
Supplement: d2ra00402j1.pdf [file d2ra00402j1.pdf]

## ESI (Electronic Supplementary Information)

Title:

**Elucidation of the reaction mechanism on dry reforming of methane in an electric field  
by *in-situ* DRIFTS**

Authors

Naoya Nakano<sup>a</sup>, Maki Torimoto<sup>a</sup>, Hiroshi Sampei<sup>a</sup>, Reiji Yamashita<sup>a</sup>, Ryota Yamano<sup>a</sup>, Koki Saegusa<sup>a</sup>, Ayaka Motomura<sup>a</sup>, Kaho Nagakawa<sup>a</sup>, Hideaki Tsuneki<sup>a</sup>, Shuhei Ogo<sup>b,c</sup> and Yasushi Sekine<sup>\*a</sup>

a Department of Applied Chemistry, Waseda University, 3-4-1, Okubo, Shinjuku, Tokyo, 169-8555, Japan, E-mail ysekine@waseda.jp, +81-3-5286-3114

b Department of Marine Resources Science, Faculty of Agriculture and Marine Science, Kochi University, Nankoku, 783-8502, Japan

c Center for Advanced Marine Core Research, Kochi University, Nankoku, 783-8502, Japan

### 1. Reaction apparatus

For the evaluation of catalytic activities of Pt/CeO<sub>2</sub> catalyst, we used an apparatus as shown in Figure S1.

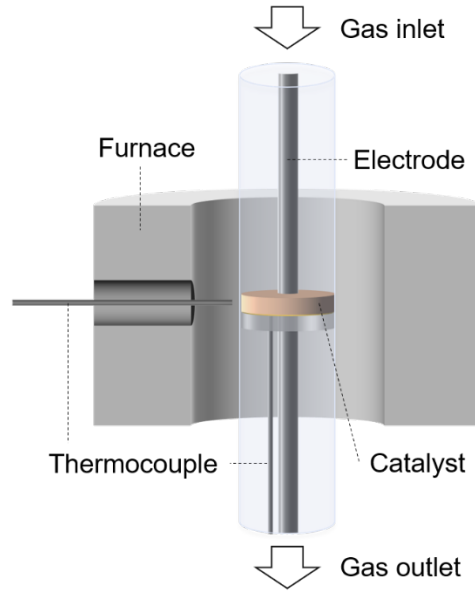

**Figure S1.** A schematic image of the apparatus for activity tests.

## 2. Calculation

The conversion, yield, and input power were calculated by the following equations.

In these equations,  $F$  denotes the product formation rate,  $S$  denotes the supply rate of the reactant, and  $r_{\text{DR}}$  and  $r_{\text{RWGS}}$  respectively represent the reaction rates of DR and RWGS reactions.

$$r_{\text{DR}} = \frac{F_{\text{H}_2} + F_{\text{CO}}}{4} \quad 2.1$$

$$r_{\text{RWGS}} = \frac{F_{\text{CO}} - F_{\text{H}_2}}{2} \quad 2.2$$

$$\text{CH}_4 \text{ conv. (\%)} = \frac{r_{\text{DR}}}{S_{\text{CH}_4}} \times 100 \quad 2.3$$

$$\text{CO}_2 \text{ conv. (\%)} = \frac{r_{\text{DR}} + r_{\text{RWGS}}}{S_{\text{CO}_2}} \times 100 \quad 2.4$$

$$\text{CO yield (\%)} = \frac{\text{CH}_4 \text{ conv.} \times \text{CO sel.}}{100} \quad 2.5$$

$$\text{Input power (W)} = \text{Input current (mA)} \times \text{Applied voltage (kV)} \quad 2.6$$

$$\text{Power efficiency (-)} = \frac{\text{Endothermic enthalpy in reaction (J s}^{-1}\text{)}}{\text{Input power (W)}} \quad 2.7$$

The  $\text{Ce}^{3+}$  fraction was calculated by the following equation.

$$\text{Ce}^{3+} \text{ fraction (\%)} = \frac{\text{Ce}^{3+}}{\text{Ce}^{3+} + \text{Ce}^{4+}} \times 100 \quad 2.8$$

### 3 *in-situ* DRIFTS assignments

**Table S1.** Assignments of vibrational bands in the DRIFT spectra at various  $\text{CeO}_2$  based catalysts.

| Structure                                                                                                       | Band / $\text{cm}^{-1}$ | Peak position / $\text{cm}^{-1}$                                                                                                                                                                                      |
|-----------------------------------------------------------------------------------------------------------------|-------------------------|-----------------------------------------------------------------------------------------------------------------------------------------------------------------------------------------------------------------------|
| 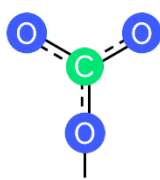<br>monodentate<br>carbonate | 1085-1088               | (1085) <sup>58</sup> , (1088) <sup>68</sup>                                                                                                                                                                           |
|                                                                                                                 | 1160                    | (1160) <sup>69</sup>                                                                                                                                                                                                  |
|                                                                                                                 | 1252                    | (1252) <sup>68</sup>                                                                                                                                                                                                  |
|                                                                                                                 | 1333-1352               | (1333) <sup>70</sup> , (1344) <sup>71</sup> , (1348) <sup>58</sup> , (1348) <sup>72</sup> , (1349) <sup>73</sup> , (1351) <sup>74</sup> ,<br>(1351) <sup>48</sup> , (1352) <sup>68</sup>                              |
|                                                                                                                 | 1357-1360               | (1357) <sup>49</sup> , (1358) <sup>58</sup> , (1360) <sup>50</sup>                                                                                                                                                    |
|                                                                                                                 | 1399-1404               | (1399) <sup>70</sup> , (1402) <sup>51</sup> , (1400, 1404) <sup>52</sup>                                                                                                                                              |
|                                                                                                                 | 1442-1460               | (1442) <sup>73</sup> , (1454) <sup>72</sup> , (1460) <sup>53</sup>                                                                                                                                                    |
|                                                                                                                 | 1463-1472               | (1463) <sup>54</sup> , (1464) <sup>58</sup> , (1465) <sup>48</sup> , (1467) <sup>68</sup> , (1472) <sup>70</sup>                                                                                                      |
|                                                                                                                 | 1489                    | (1489) <sup>55</sup>                                                                                                                                                                                                  |
|                                                                                                                 | 1504-1519               | (1504) <sup>71</sup> , (1504) <sup>74</sup> , (1504) <sup>48</sup> , (1507) <sup>56</sup> , (1509) <sup>57</sup> , (1510) <sup>49</sup> ,<br>(1510) <sup>50</sup> , (1519) <sup>59</sup> , (1505, 1514) <sup>70</sup> |
|                                                                                                                 | 1527                    | (1527) <sup>73</sup>                                                                                                                                                                                                  |
|                                                                                                                 | 1540                    | (1540) <sup>57</sup>                                                                                                                                                                                                  |

|                                                                                                              |                                                                                                          |                                                                                                                                                                                                                                                                                                                                                                                                                        |
|--------------------------------------------------------------------------------------------------------------|----------------------------------------------------------------------------------------------------------|------------------------------------------------------------------------------------------------------------------------------------------------------------------------------------------------------------------------------------------------------------------------------------------------------------------------------------------------------------------------------------------------------------------------|
|                                                                                                              | 1578-1580                                                                                                | (1578) <sup>52</sup> , (1580) <sup>50</sup> , (1580) <sup>51</sup>                                                                                                                                                                                                                                                                                                                                                     |
| 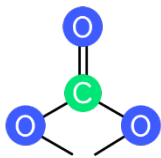<br>bidentate carbonate     | 1009-1024                                                                                                | (1011) <sup>68</sup> , (1011) <sup>72</sup> , (1011) <sup>56</sup> , (1014) <sup>74</sup> , (1021) <sup>48</sup> , (1024) <sup>52</sup> , (1009-1014) <sup>58</sup>                                                                                                                                                                                                                                                    |
|                                                                                                              | 1028-1034                                                                                                | (1028) <sup>58</sup> , (1028) <sup>72</sup> , (1030) <sup>52</sup> , (1032) <sup>53</sup>                                                                                                                                                                                                                                                                                                                              |
|                                                                                                              | 1265-1273                                                                                                | (1266) <sup>60</sup> , (1273) <sup>61</sup> , (1265, 1267) <sup>52</sup>                                                                                                                                                                                                                                                                                                                                               |
|                                                                                                              | 1281-1303                                                                                                | (1286) <sup>72</sup> , (1287) <sup>56</sup> , (1289) <sup>74</sup> , (1289) <sup>62</sup> , (1289) <sup>63</sup> , (1290) <sup>48</sup> , (1290) <sup>53</sup> , (1292) <sup>51</sup> , (1292) <sup>54</sup> , (1292) <sup>59</sup> , (1294) <sup>71</sup> , (1298) <sup>58</sup> , (1300) <sup>50</sup> , (1300) <sup>60</sup> , (1281, 1298) <sup>52</sup> , (1290, 1301) <sup>70</sup> , (1298, 1303) <sup>57</sup> |
|                                                                                                              | 1315                                                                                                     | (1315) <sup>50</sup>                                                                                                                                                                                                                                                                                                                                                                                                   |
|                                                                                                              | 1541                                                                                                     | (1541) <sup>73</sup>                                                                                                                                                                                                                                                                                                                                                                                                   |
|                                                                                                              | 1560-1576                                                                                                | (1560) <sup>68</sup> , (1562) <sup>61</sup> , (1567) <sup>74</sup> , (1568) <sup>57</sup> , (1570) <sup>71</sup> , (1570) <sup>56</sup> , (1570) <sup>11</sup> , (1572) <sup>52</sup> , (1574) <sup>70</sup> , (1575) <sup>53</sup> , (1575) <sup>59</sup> , (1576) <sup>48</sup> , (1562, 1565) <sup>58</sup> , (1562, 1568) <sup>72</sup>                                                                            |
|                                                                                                              | 1580-1581                                                                                                | (1580) <sup>51</sup> , (1580) <sup>54</sup> , (1580) <sup>60</sup> , (1581) <sup>70</sup>                                                                                                                                                                                                                                                                                                                              |
|                                                                                                              | 1647                                                                                                     | (1647) <sup>52</sup>                                                                                                                                                                                                                                                                                                                                                                                                   |
|                                                                                                              | <br>bridged carbonate | 1120-1150                                                                                                                                                                                                                                                                                                                                                                                                              |
| 1195                                                                                                         |                                                                                                          | (1195) <sup>49</sup>                                                                                                                                                                                                                                                                                                                                                                                                   |
| 1208                                                                                                         |                                                                                                          | (1208) <sup>52</sup>                                                                                                                                                                                                                                                                                                                                                                                                   |
| 1232-1242                                                                                                    |                                                                                                          | (1232) <sup>58</sup> , (1241) <sup>51</sup> , (1242) <sup>54</sup>                                                                                                                                                                                                                                                                                                                                                     |
| 1651                                                                                                         |                                                                                                          | (1651) <sup>54</sup>                                                                                                                                                                                                                                                                                                                                                                                                   |
| 1675-1695                                                                                                    |                                                                                                          | (1675, 1687) <sup>51</sup> , (1688, 1695) <sup>52</sup>                                                                                                                                                                                                                                                                                                                                                                |
| 1728-1740                                                                                                    |                                                                                                          | (1728) <sup>72</sup> , (1736) <sup>74</sup> , (1736) <sup>48</sup> , (1728, 1740) <sup>58</sup>                                                                                                                                                                                                                                                                                                                        |
| 1781                                                                                                         |                                                                                                          | (1781) <sup>52</sup>                                                                                                                                                                                                                                                                                                                                                                                                   |
| <br>polydentate carbonate | 1066-1074                                                                                                | (1066) <sup>58</sup> , (1066) <sup>74</sup> , (1073) <sup>62</sup>                                                                                                                                                                                                                                                                                                                                                     |
|                                                                                                              | 1352-1353                                                                                                | (1352) <sup>62</sup> , (1353) <sup>58</sup> , (1353) <sup>74</sup>                                                                                                                                                                                                                                                                                                                                                     |
|                                                                                                              | 1366-1389                                                                                                | (1366) <sup>71</sup> , (1367) <sup>56</sup> , (1373) <sup>62</sup> , (1376) <sup>11</sup> , (1378) <sup>59</sup> , (1389) <sup>5</sup>                                                                                                                                                                                                                                                                                 |
|                                                                                                              | 1462                                                                                                     | (1462) <sup>58</sup> , (1462) <sup>71</sup> , (1462) <sup>74</sup>                                                                                                                                                                                                                                                                                                                                                     |
|                                                                                                              | 1473-1479                                                                                                | (1473) <sup>62</sup> , (1476) <sup>56</sup> , (1479) <sup>59</sup>                                                                                                                                                                                                                                                                                                                                                     |
|                                                                                                              | 1591                                                                                                     | (1591) <sup>57</sup>                                                                                                                                                                                                                                                                                                                                                                                                   |

|                                                                                    |           |                                                                                                                                                                                                                                                                                                                                                                                      |
|------------------------------------------------------------------------------------|-----------|--------------------------------------------------------------------------------------------------------------------------------------------------------------------------------------------------------------------------------------------------------------------------------------------------------------------------------------------------------------------------------------|
| bicarbonate                                                                        | 990       | (990) <sup>64</sup>                                                                                                                                                                                                                                                                                                                                                                  |
|                                                                                    | 1025      | (1025) <sup>74</sup> , (1025) <sup>48</sup> , (1025) <sup>51</sup>                                                                                                                                                                                                                                                                                                                   |
| 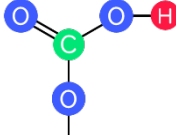  | 1043-1060 | (1045) <sup>74</sup> , (1056) <sup>52</sup> , (1060) <sup>59</sup> , (1043, 1045) <sup>58</sup>                                                                                                                                                                                                                                                                                      |
|                                                                                    | 1210-1220 | (1212) <sup>48</sup> , (1212) <sup>65</sup> , (1214) <sup>50</sup> , (1215) <sup>54</sup> , (1216) <sup>52</sup> , (1216) <sup>60</sup> , (1217) <sup>71</sup> , (1217) <sup>56</sup> , (1218) <sup>74</sup> , (1220) <sup>69</sup> , (1220) <sup>59</sup> , (1220) <sup>61</sup> , (1215, 1216) <sup>51</sup> , (1217, 1218) <sup>58</sup> , (1217, 1220) <sup>70</sup>             |
|                                                                                    | 1390-1398 | (1390) <sup>64</sup> , (1390) <sup>65</sup> , (1391) <sup>74</sup> , (1392) <sup>74</sup> , (1396) <sup>71</sup> , (1398) <sup>54</sup> , (1391, 1393) <sup>58</sup> , (1392, 1395) <sup>52</sup>                                                                                                                                                                                    |
|                                                                                    | 1404-1436 | (1404) <sup>56</sup> , (1405) <sup>50</sup> , (1413) <sup>68</sup> , (1413) <sup>74</sup> , (1413) <sup>48</sup> , (1419) <sup>71</sup> , (1411, 1415) <sup>70</sup> , (1436, 1425-1426) <sup>49</sup>                                                                                                                                                                               |
|                                                                                    | 1590-1616 | (1590) <sup>65</sup> , (1594) <sup>59</sup> , (1598) <sup>68</sup> , (1599) <sup>48</sup> , (1600) <sup>54</sup> , (1600) <sup>60</sup> , (1603) <sup>61</sup> , (1608) <sup>71</sup> , (1609) <sup>51</sup> , (1614) <sup>50</sup> , (1599, 1613) <sup>74</sup> , (1603, 1608) <sup>70</sup> , (1609, 1615) <sup>57</sup> , (1611, 1613) <sup>58</sup> , (1611, 1616) <sup>52</sup> |
|                                                                                    | 1641      | (1641-1642) <sup>49</sup>                                                                                                                                                                                                                                                                                                                                                            |
| formate                                                                            | 1329-1330 | (1329) <sup>66</sup> , (1330) <sup>67</sup> , (1329, 1330) <sup>58</sup>                                                                                                                                                                                                                                                                                                             |
|                                                                                    | 1353-1355 | (1353) <sup>68</sup> , (1354) <sup>54</sup> , (1355) <sup>67</sup>                                                                                                                                                                                                                                                                                                                   |
|  | 1368-1372 | (1368) <sup>59</sup> , (1369) <sup>72</sup> , (1369) <sup>66</sup> , (1370) <sup>65</sup> , (1371) <sup>68</sup> , (1371) <sup>54</sup> , (1372) <sup>58</sup>                                                                                                                                                                                                                       |
|                                                                                    | 1545-1558 | (1545) <sup>61</sup> , (1550) <sup>65</sup> , (1555) <sup>53</sup> , (1555) <sup>67</sup> , (1557) <sup>68</sup> , (1558) <sup>72</sup> , (1558) <sup>62</sup> , (1558) <sup>66</sup>                                                                                                                                                                                                |
|                                                                                    | 1582-1587 | (1585) <sup>65</sup> , (1582, 1587) <sup>58</sup>                                                                                                                                                                                                                                                                                                                                    |

#### 4. Prepared catalysts

Following figures show the nature of prepared catalyst of Pt/CeO<sub>2</sub>.

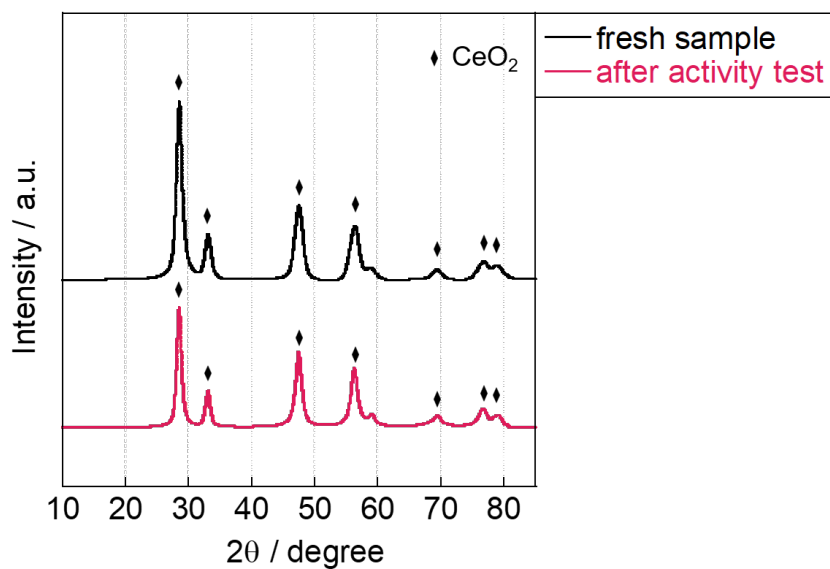

**Figure S2.** XRD patterns of 1 wt% Pt/CeO<sub>2</sub> (fresh and after activity test).

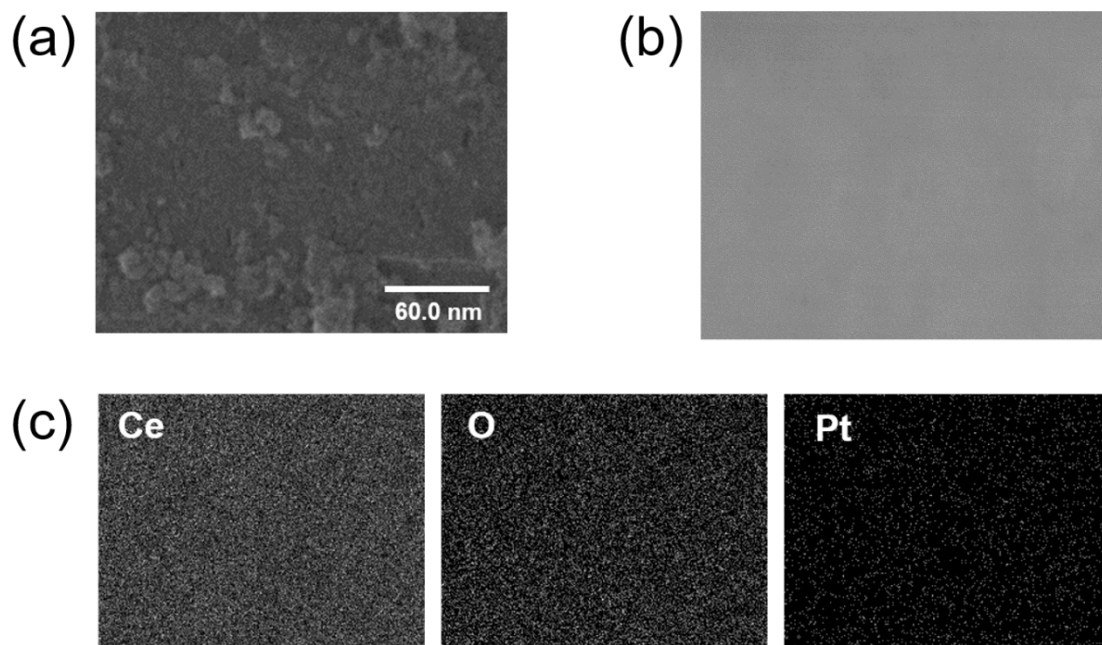

**Figure S3.** HAADF-STEM images of fresh 1 wt% Pt/CeO<sub>2</sub>, (a) STEM image (b) HAADF-STEM image (c) EDX elemental mappings of Ce, O, Pt.

## 5. Catalytic activities and other results

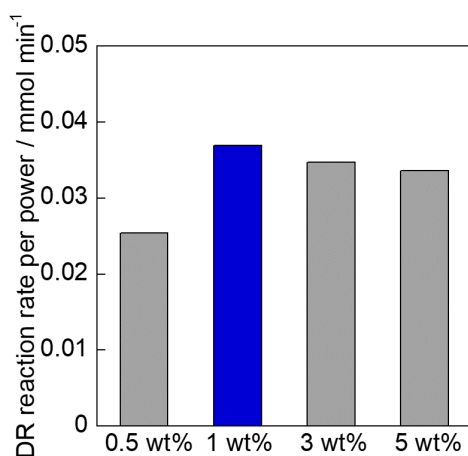

**Figure S4.** Reaction rate over various catalysts. Reaction conditions: 0.1 g of Pt/CeO<sub>2</sub>; CH<sub>4</sub>: CO<sub>2</sub>: Ar = 1:1:2, total 80 SCCM; reaction temperature was 473 K; 10 mA imposed current.

**Table S2.** Catalytic activity over 1wt% Pt/CeO<sub>2</sub> with, without EF; CH<sub>4</sub>: CO<sub>2</sub>: Ar = 1:1:2; 80 SCCM total flow rate; 300 mg catalyst weight; 20.0 mA imposed current.

| Temp. | CH <sub>4</sub><br>conv. | CO <sub>2</sub><br>conv. | H <sub>2</sub> /CO | Input<br>current | Voltage | Power | Faradaic<br>number | Energy<br>efficiency | Field<br>intensity   |
|-------|--------------------------|--------------------------|--------------------|------------------|---------|-------|--------------------|----------------------|----------------------|
| / K   | / %                      | / %                      | / -                | / mA             | / V     | / W   | / -                | / -                  | / V mm <sup>-1</sup> |
| 453   | 15.1                     | 16.4                     | 0.763              | 20.0             | 140     | 2.81  | 14.5               | 0.186                | 57.3                 |
| 473   | 15.0                     | 16.5                     | 0.754              | 20.0             | 145     | 2.91  | 14.5               | 0.179                | 59.3                 |
| 523   | 15.9                     | 17.9                     | 0.728              | 20.0             | 137     | 2.74  | 15.5               | 0.203                | 56.0                 |
| 573   | 16.4                     | 19.2                     | 0.696              | 20.0             | 130     | 2.61  | 16.4               | 0.223                | 53.2                 |
| 623   | 17.4                     | 20.9                     | 0.667              | 20.0             | 127     | 2.54  | 17.7               | 0.244                | 51.8                 |
| 672   | 19.1                     | 24.0                     | 0.625              | 20.0             | 132     | 2.63  | 20.0               | 0.262                | 53.8                 |
| 723   | 27.5                     | 34.6                     | 0.623              | 20.0             | 144     | 2.87  | 28.8               | 0.347                | 58.6                 |
| 472   | 0                        | 0                        | -                  | -                | -       | -     | -                  | -                    | -                    |
| 523   | 0.00                     | 0.01                     | 0.00               | -                | -       | -     | -                  | -                    | -                    |
| 573   | 0.03                     | 0.07                     | 0.00               | -                | -       | -     | -                  | -                    | -                    |
| 623   | 0.15                     | 0.42                     | 0.00               | -                | -       | -     | -                  | -                    | -                    |
| 673   | 0.66                     | 1.60                     | 0.135              | -                | -       | -     | -                  | -                    | -                    |
| 723   | 2.21                     | 4.75                     | 0.237              | -                | -       | -     | -                  | -                    | -                    |

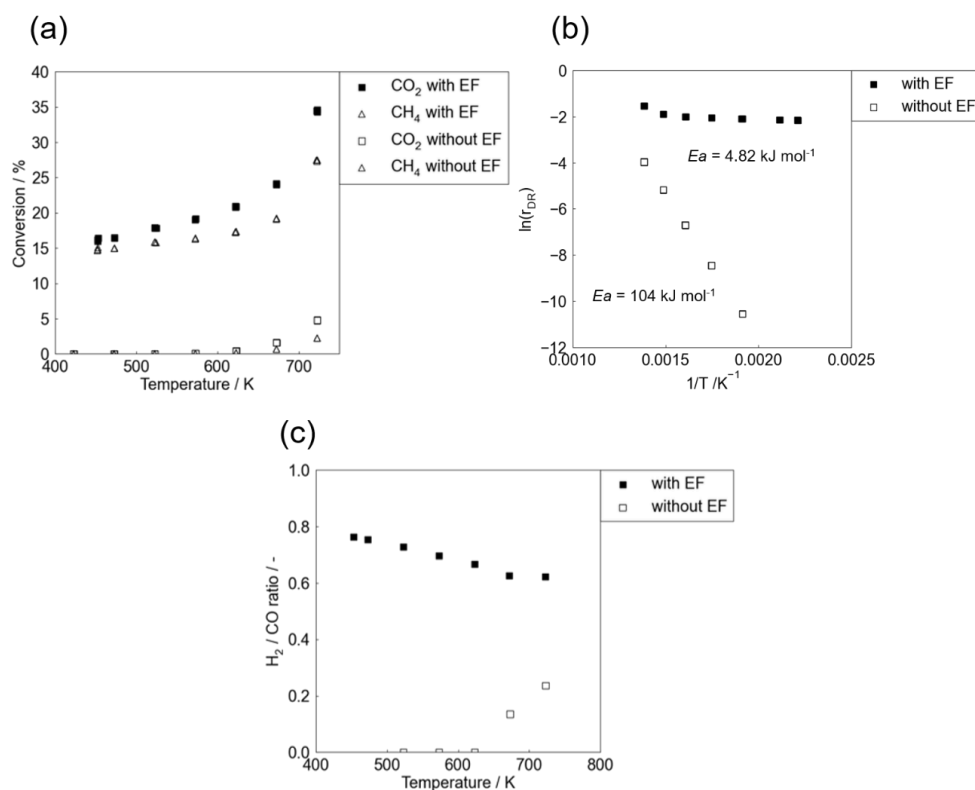

**Figure S5.** (a) Comparison of the conversion with, without EF over 1wt% Pt/CeO<sub>2</sub> (b) Arrhenius plot of DRM reaction rate, (c) H<sub>2</sub>/CO ratio with, without EF; CH<sub>4</sub>: CO<sub>2</sub>: Ar = 1: 1: 2; 80 SCCM total flow rate; 300 mg catalyst weight; 20.0 mA imposed current.

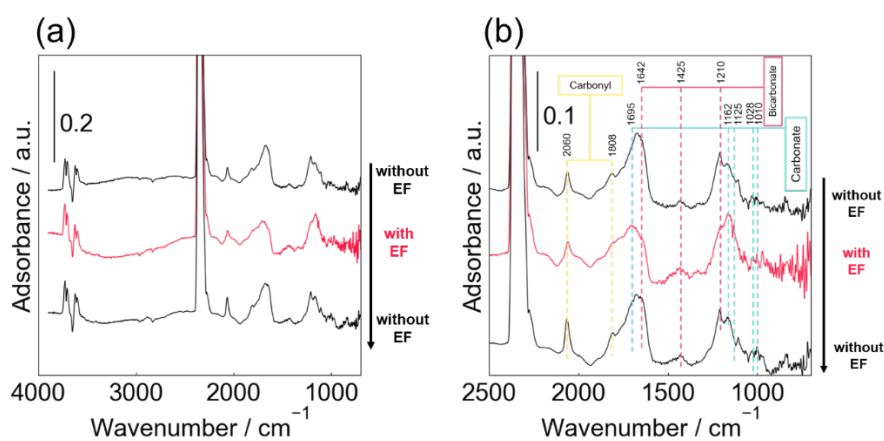

**Figure S6.** *In-situ* DRIFT spectra after switching the EF on and off and hold 20 min at 473 K over 1wt% Pt/CeO<sub>2</sub>; Ar: CO<sub>2</sub> = 8: 1, total 90 SCCM; 3 mA imposed current; (a) spectra in 700 – 4000 cm<sup>-1</sup>, (b) spectra in 700 – 2300 cm<sup>-1</sup> region.



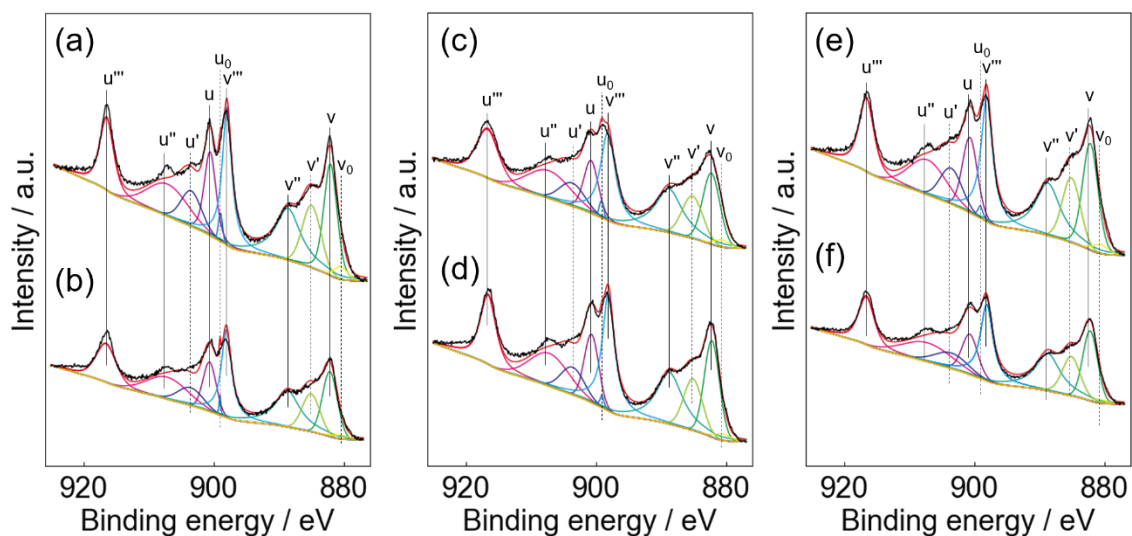

**Figure S7.** XPS spectra of 1wt% Pt/CeO<sub>2</sub> under CH<sub>4</sub> flow(left) with (a), without (b) EF, under Ar flow (middle) with (c), without(d) EF, under CO<sub>2</sub> flow(right) with (e), without (d) EF.

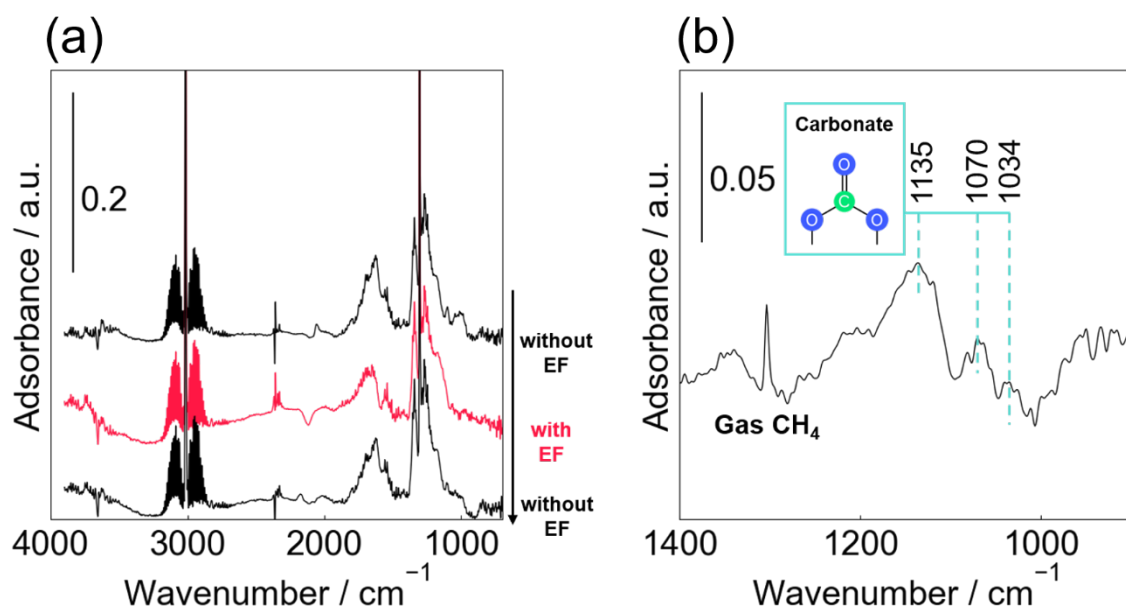

**Figure S8.** (a) Comparison of DRIFT spectra over 1wt% Pt/CeO<sub>2</sub> with, without EF in CH<sub>4</sub> flow, (b) difference spectrum in 900 – 1400 cm<sup>-1</sup> region (with EF – without EF); Ar: CO<sub>2</sub> = 8: 1, total 90 SCCM; 3 mA imposed current.

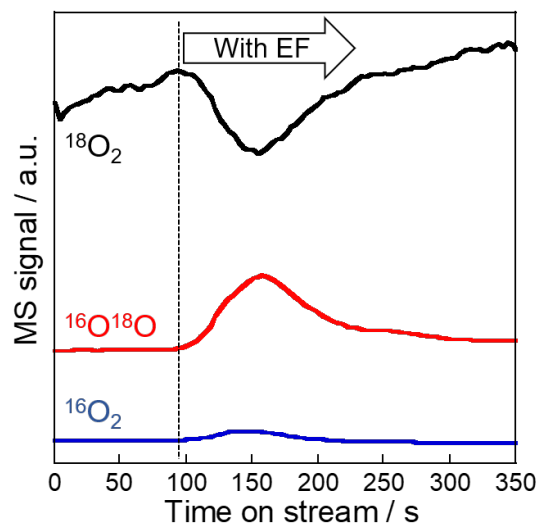

**Figure S9.** Formation rates of various gas productions in 2500 ppm  $^{18}\text{O}_2$  (2500 ppm; 100 SCCM total flow rate) over 0.5wt% Pd supported  $\text{Ce}_{0.7}\text{Zr}_{0.3}^{16}\text{O}_2$  catalyst at 373 K.

Isotopic exchange test was conducted by following procedure.

Isotopic exchange test was conducted using a quadrupole mass spectrometer (Q-Mass, QGA; Hiden Analytical Ltd.) with 0.5 wt% Pd/ $\text{Ce}_{0.7}\text{Zr}_{0.3}\text{O}_2$ . The catalysts were pre-oxidized and reduced at 773 K for 15 min, respectively. The oxidation gas was 5%  $^{16}\text{O}_2$ , and the reduction gas was 5 %  $\text{H}_2$ . After the pre-treatment, the catalyst was purged with Ar at 373 K. We applied the EF in the 50 %  $^{18}\text{O}_2$  flow and analyzed the production gas. All the gases were diluted to 100 SCCM with Ar.

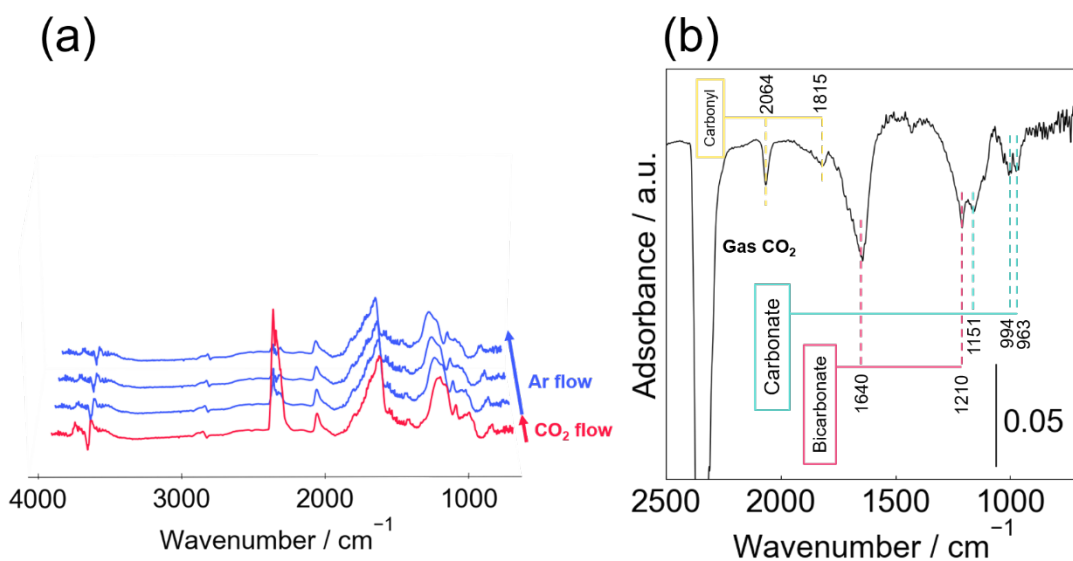

**Figure S10.** *In-situ* DRIFT spectra over 1wt% Pt/CeO<sub>2</sub> at 473 K after switching CO<sub>2</sub> (Ar: CO<sub>2</sub> = 8: 1, 90 SCCM total flow rate) to Ar (Ar; 90 SCCM total flow rate) feeds and hold 20 min at 473 K; 3 mA imposed current. (a) spectra in 700 – 4000 cm<sup>-1</sup>, (b) differential spectra in 700 – 2500 cm<sup>-1</sup> (Ar – CO<sub>2</sub>).

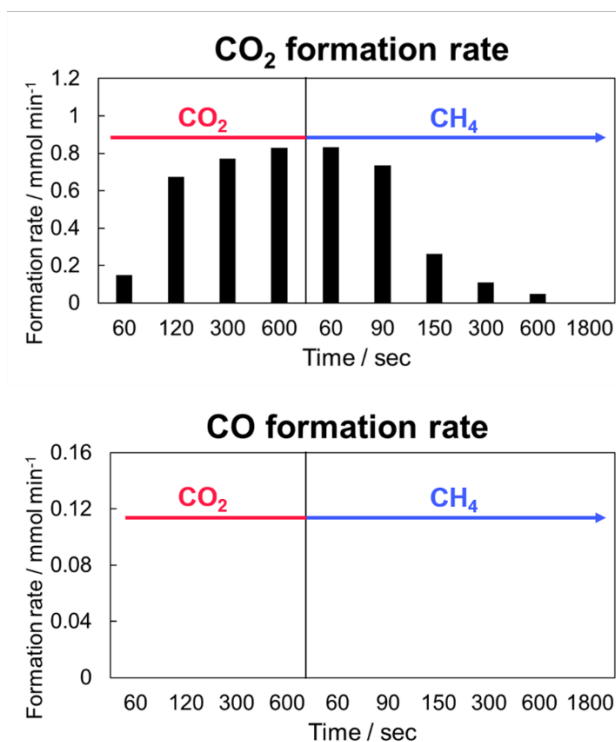

**Figure S11.** CO<sub>2</sub> and CO formation rate over 1wt% Pt/CeO<sub>2</sub> without EF before and after switching CO<sub>2</sub> (CO<sub>2</sub>: Ar = 8: 1, 90 SCCM total flow rate) to Ar (Ar 80 SCCM total flow rate) flow at 473 K.

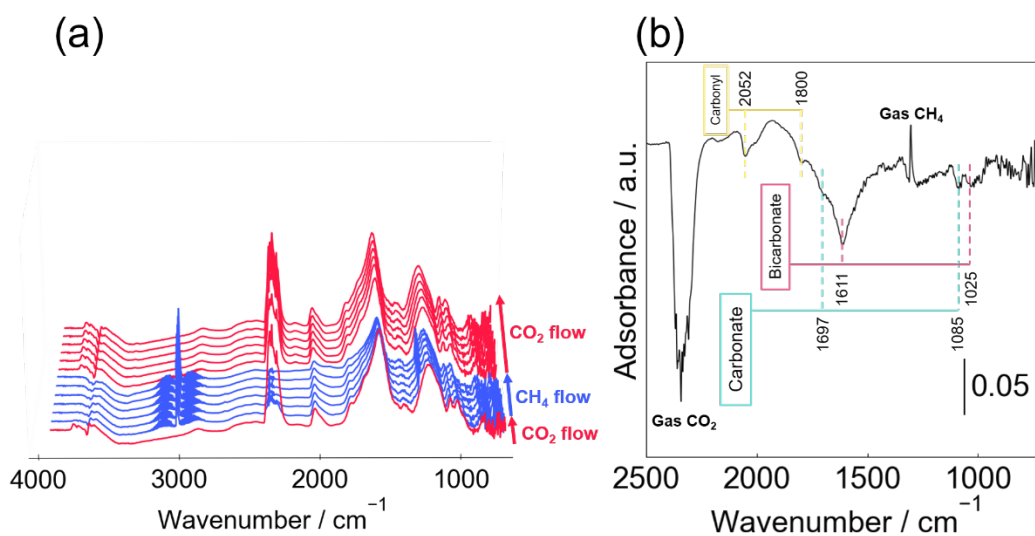

**Figure S12.** *In-situ* DRIFT spectra over 1wt% Pt/CeO<sub>2</sub> switching between CO<sub>2</sub> (CO<sub>2</sub>: Ar = 1: 8; 90 SCCM total flow rate) and CH<sub>4</sub> (CH<sub>4</sub>: Ar = 1: 8; 90 SCCM total flow rate) feeds at 473 K; (a) 60, 120, 180, 300, 600, 1200 seconds after switching to CH<sub>4</sub>, 60, 120, 180, 300, 600, 1200 seconds after switching to CO<sub>2</sub>, (b) differential spectra of steady state in 700 – 2500  $\text{cm}^{-1}$  (CH<sub>4</sub> – CO<sub>2</sub>).

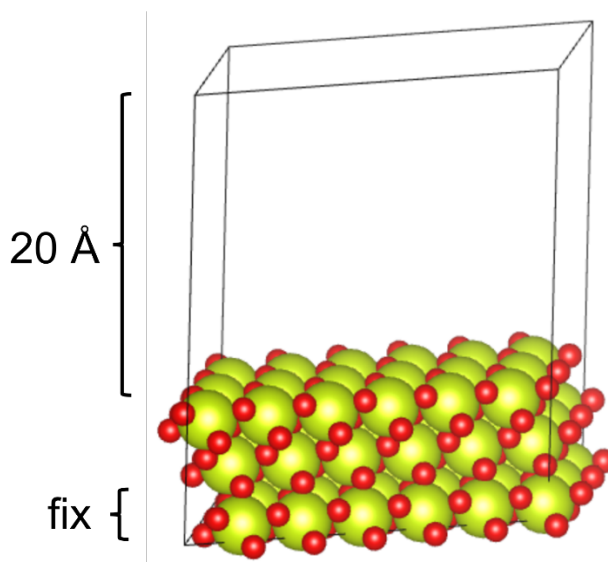

**Figure S13.** The CeO<sub>2</sub> slab model, the yellow green, and red sphere are Ce, O, respectively.

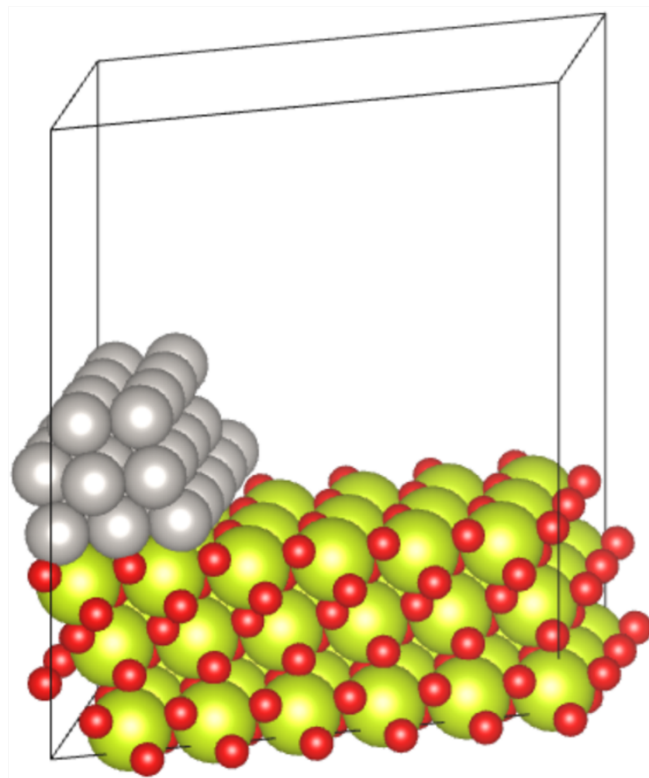

**Figure S14.** The Pt/CeO<sub>2</sub> model, the yellow green, red, and silver sphere are Ce, O, and Pt, respectively.

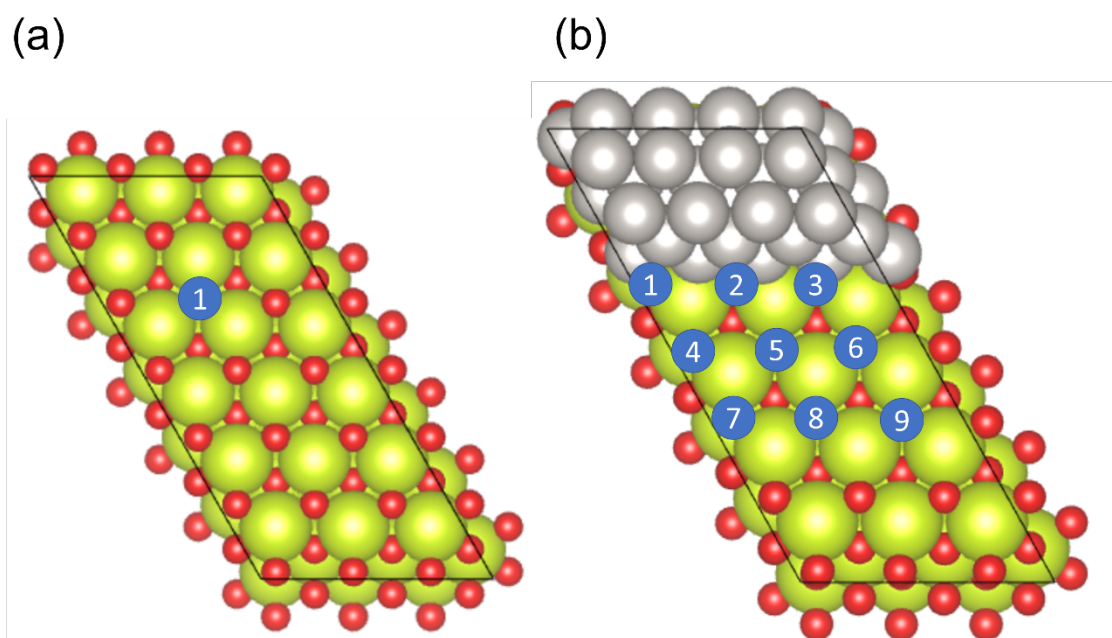

**Figure S15.** The calculated oxygen defect locations; (a)CeO<sub>2</sub>, (b)Pt/CeO<sub>2</sub>.

**Table S3.** The formation energy of oxygen defect ( $V_{ox}$ ) at each site.

| model                                       | Vox site | E( $V_{ox}$ )<br>/ eV |
|---------------------------------------------|----------|-----------------------|
| CeO <sub>2</sub>                            | 1        | 4.148                 |
| <hr style="border-top: 1px dashed black;"/> |          |                       |
|                                             | 1        | 3.994                 |
|                                             | 2        | 3.790                 |
|                                             | 3        | 3.997                 |
|                                             | 4        | 4.825                 |
| Pt/CeO <sub>2</sub>                         | 5        | 4.803                 |
|                                             | 6        | 4.861                 |
|                                             | 7        | 4.876                 |
|                                             | 8        | 4.853                 |
|                                             | 9        | 4.875                 |
